# Supplementary material for: Abnormal concentrations of Cu–Co inHaumaniastrum katangense,Haumaniastrum robertiiandAeolanthus biformifolius: contamination or hyperaccumulation?
Source: Royal Society of Chemistry journal article supplement (doi:10.1039/c8mt00300a), 2019-01-21
Supplement: c8mt00300a1.pdf [file c8mt00300a1.pdf]

## SUPPLEMENTARY INFORMATION

# **Abnormal concentrations of Cu-Co in *Haumaniastrum katangense*, *Haumaniastrum robertii* and *Aeolanthus biformifolius*: contamination or hyperaccumulation?**

Antony van der Ent<sup>ab</sup>, François Malaisse<sup>cd</sup>, Peter D. Erskine<sup>a</sup>, Jolanta Mesjasz-Przybyłowicz<sup>e</sup>,  
Wojciech J. Przybyłowicz<sup>ef</sup>, Alban D. Barnabas<sup>e</sup>, Marta Sośnicka<sup>gh</sup>, Hugh H. Harris<sup>i</sup>

<sup>a</sup> Centre for Mined Land Rehabilitation, Sustainable Minerals Institute, The University of Queensland, Queensland, Australia

<sup>b</sup> Université de Lorraine – INRA, Laboratoire Sols et Environnement, UMR 1120, France

<sup>c</sup> Biodiversity and Landscape Unit, Gembloux Agro-Bio Tech, Liège, University, Gembloux 5030, Belgium

<sup>d</sup> National Botanic Gardens, Meise 1860, Belgium

<sup>e</sup> Department of Botany and Zoology, Stellenbosch University, Private Bag X1, Matieland 7602, South Africa

<sup>f</sup> AGH University of Science and Technology, Faculty of Physics & Applied Computer Science, 30-059 Kraków, Poland

<sup>g</sup> GFZ, German Research Centre for Geosciences, Telegrafenberg, D-14473 Potsdam, Germany

<sup>h</sup> University of the Witwatersrand, 1 Jan Smuts Ave, Braamfontein, Johannesburg 2000, South Africa

<sup>i</sup> Department of Chemistry, The University of Adelaide, South Australia, Australia

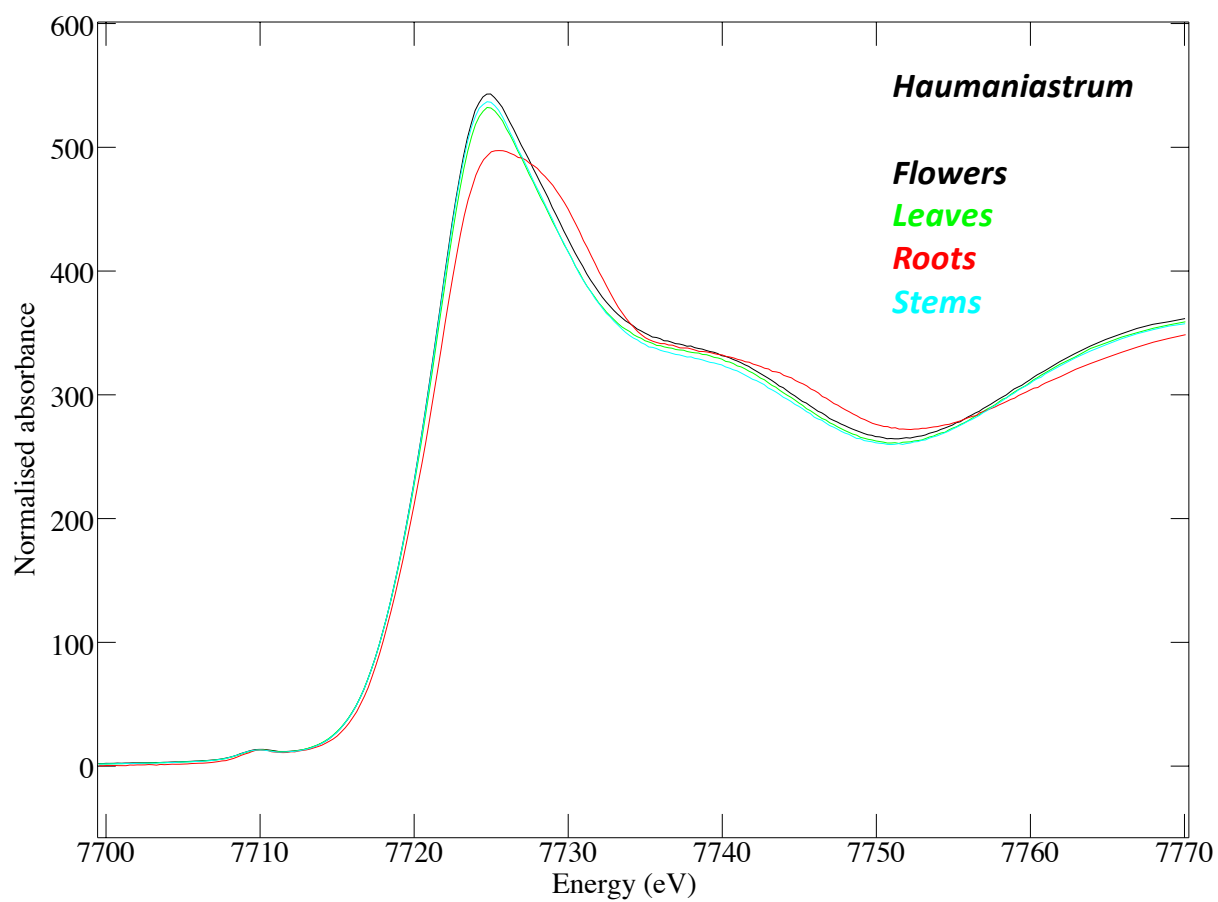

**Supplementary Figure 1.** Comparison of Cobalt XANES spectra of *Haumaniastrum katangense* (S.Moore) P.A.Duvign. & Plancke (Lamiaceae) roots, stems, leaves and flowers.

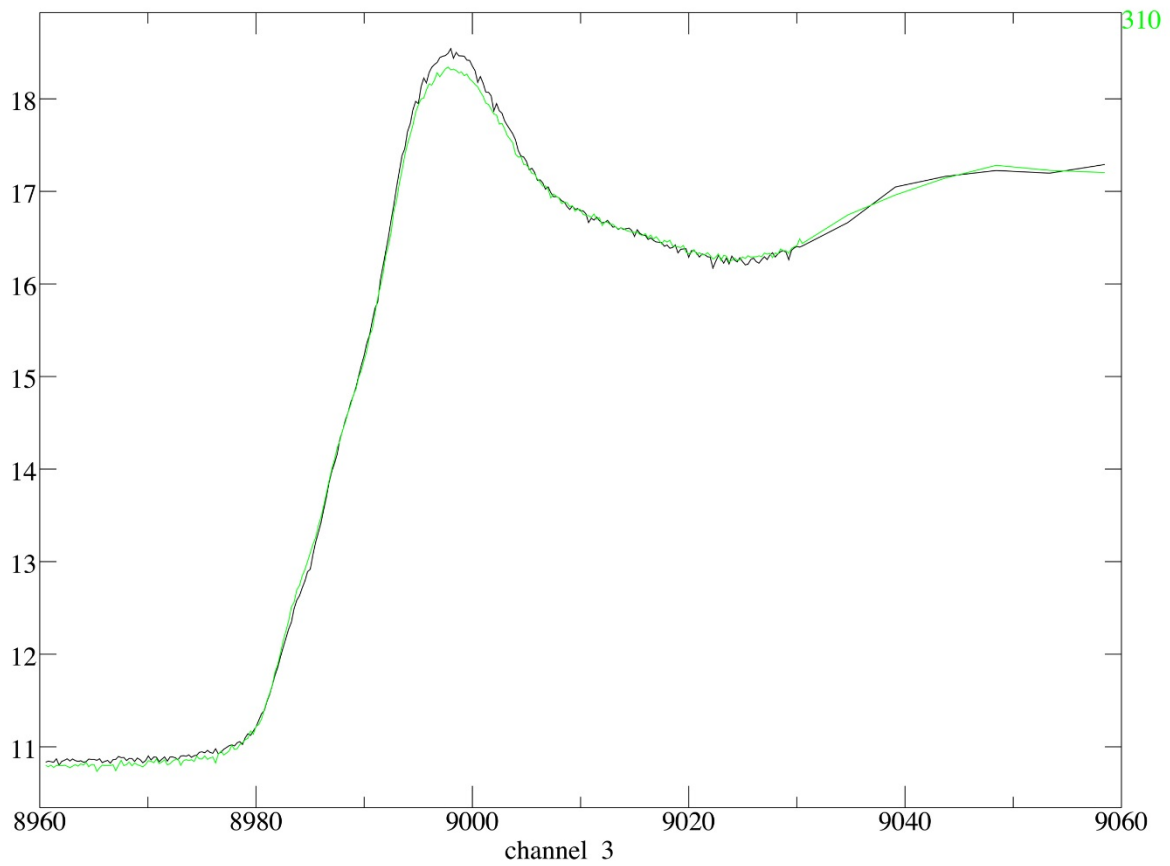

**Supplementary Figure 2.** Cobalt XANES spectra of *Haumaniastrum katangense* (S.Moore) P.A.Duvign. & Plancke (Lamiaceae) leaves showing the effect of photo-reduction. Black trace shows first XANES acquisition, and green trace shows repeat XANES acquisition.
